# Supplementary material
Source: publisher figshare collection journal article supplement (https://geolsoc.figshare.com/ndownloader/files/26181386)
Supplement: Supplementary file 1 [file 26181386]

## Sheet: Input
Input Number of Grains	Source 1	Source 2	Source 3	Source 4	Source 5				Total number of grains		Input Proportions	Source 1	Source 2	Source 3	Source 4	Source 5	Source 6	Source 7		Total proportion
Sink 1	30	37	2	3	19				91		Sink 1	0.32967	0.406593	0.021978	0.032967	0.208791	0	0	0	1
Sink 2	17	49	7	10	8				91		Sink 2	0.186813	0.538462	0.0769231	0.10989	0.0879121	0	0	0	1
Sink 3	14	13	19	7	38				91		Sink 3	0.153846	0.142857	0.208791	0.0769231	0.417582	0	0	0	1
Sink 4	17	22	28	15	9				91		Sink 4	0.186813	0.241758	0.307692	0.164835	0.0989011	0	0	0	1
Sink 5	27	9	18	11	26				91		Sink 5	0.296703	0.0989011	0.197802	0.120879	0.285714	0	0	0	1
Sink 6	39	11	5	19	17				91		Sink 6	0.428571	0.120879	0.0549451	0.208791	0.186813	0	0	0	1
Sink 7	64	2	20	2	3				91		Sink 7	0.703297	0.021978	0.21978	0.021978	0.032967	0	0	0	1
Sink 8	1	6	24	1	59				91		Sink 8	0.010989	0.0659341	0.263736	0.010989	0.648352	0	0	0	1
Sink 9	4	6	5	71	5				91		Sink 9	0.043956	0.0659341	0.0549451	0.78022	0.0549451	0	0	0	1
Sink 10	51	21	16	3	0				91		Sink 10	0.56044	0.230769	0.175824	0.032967	0	0	0	0	1
Sink 11	18	21	8	4	40				91		Sink 11	0.197802	0.230769	0.0879121	0.043956	0.43956	0	0	0	1
Sink 12	2	50	2	0	37				91		Sink 12	0.021978	0.549451	0.021978	0	0.406593	0	0	0	1
Sink 13	34	13	4	37	3				91		Sink 13	0.373626	0.142857	0.043956	0.406593	0.032967	0	0	0	1
Sink 14	0	28	1	2	60				91		Sink 14	0	0.307692	0.010989	0.021978	0.659341	0	0	0	1
Sink 15	21	4	10	46	10				91		Sink 15	0.230769	0.043956	0.10989	0.505495	0.10989	0	0	0	1
Sink 16	45	13	3	3	27				91		Sink 16	0.494505	0.142857	0.032967	0.032967	0.296703	0	0	0	1
Sink 17	3	15	7	7	59				91		Sink 17	0.032967	0.164835	0.0769231	0.0769231	0.648352	0	0	0	1
Sink 18	70	2	6	12	1				91		Sink 18	0.769231	0.021978	0.0659341	0.131868	0.010989	0	0	0	1
Sink 19	8	45	8	23	7				91		Sink 19	0.0879121	0.494505	0.0879121	0.252747	0.0769231	0	0	0	1
Sink 20	20	7	18	2	44				91		Sink 20	0.21978	0.0769231	0.197802	0.021978	0.483516	0	0	0	1
Sink 21	54	23	6	6	2				91		Sink 21	0.593407	0.252747	0.0659341	0.0659341	0.021978	0	0	0	1
Sink 22	82	3	3	0	3				91		Sink 22	0.901099	0.032967	0.032967	0	0.032967	0	0	0	1
Sink 23	29	51	4	2	5				91		Sink 23	0.318681	0.56044	0.043956	0.021978	0.0549451	0	0	0	1
Sink 24	22	51	17	1	0				91		Sink 24	0.241758	0.56044	0.186813	0.010989	0	0	0	0	1
Sink 25	17	32	5	25	12				91		Sink 25	0.186813	0.351648	0.0549451	0.274725	0.131868	0	0	0	1
Sink 26	20	1	14	53	3				91		Sink 26	0.21978	0.010989	0.153846	0.582418	0.032967	0	0	0	1
Sink 27	7	7	8	10	59				91		Sink 27	0.0769231	0.0769231	0.0879121	0.10989	0.648352	0	0	0	1
Sink 28	24	20	2	33	12				91		Sink 28	0.263736	0.21978	0.021978	0.362637	0.131868	0	0	0	1
Sink 29	3	58	15	9	6				91		Sink 29	0.032967	0.637363	0.164835	0.0989011	0.0659341	0	0	0	1
Sink 30	22	26	13	5	25				91		Sink 30	0.241758	0.285714	0.142857	0.0549451	0.274725	0	0	0	1
Sink 31	10	60	21	0	0				91		Sink 31	0.10989	0.659341	0.230769	0	0	0	0	0	1
Sink 32	33	21	5	26	6				91		Sink 32	0.362637	0.230769	0.0549451	0.285714	0.0659341	0	0	0	1
Sink 33	0	18	0	0	73				91		Sink 33	0	0.197802	0	0	0.802198	0	0	0	1
Sink 34	26	29	1	11	24				91		Sink 34	0.285714	0.318681	0.010989	0.120879	0.263736	0	0	0	1
Sink 35	10	72	0	0	9				91		Sink 35	0.10989	0.791209	0	0	0.0989011	0	0	0	1
Sink 36	11	5	66	6	3				91		Sink 36	0.120879	0.0549451	0.725275	0.0659341	0.032967	0	0	0	1
Sink 37	21	9	18	41	2				91		Sink 37	0.230769	0.0989011	0.197802	0.450549	0.021978	0	0	0	1
Sink 38	2	1	84	3	1				91		Sink 38	0.021978	0.010989	0.923077	0.032967	0.010989	0	0	0	1
Sink 39	16	46	1	14	14				91		Sink 39	0.175824	0.505495	0.010989	0.153846	0.153846	0	0	0	1
Sink 40	4	3	7	64	13				91		Sink 40	0.043956	0.032967	0.0769231	0.703297	0.142857	0	0	0	1

## Sheet: output5
	Weights Source 3	Weights Source 4	Weights Source 2	Weights Source 5	Weights Source 1
S1	0.343877	0.305178	0	0.0927092	0.258236
S2	0.227222	0.438634	0.0627953	0.15707	0.114278
S3	0.17598	0.0322256	0.210696	0.122151	0.458947
S4	0.158707	0.188219	0.364226	0.200732	0.0881166
S5	0.293638	0.0462939	0.153135	0.162364	0.344569
S6	0.401219	0.0412662	0.101212	0.295137	0.161166
S7	0.674282	0.0294589	0.138889	0.143002	0.0143676
S8	0	0	0.309739	0.0216632	0.668598
S9	0.0416263	0.0368798	0	0.875563	0.0459304
S10	0.6066	0.249416	0.0942521	0.0497315	0
S11	0.155312	0.192937	0.129472	0.0597383	0.462541
S12	0.00635924	0.499542	0.014832	0.0220112	0.457256
S13	0.307262	0.0583228	0.108545	0.513264	0.0126066
S14	0.0221518	0.19513	0	0.00767684	0.775042
S15	0.241293	0.0195291	0.111346	0.55574	0.0720914
S16	0.479937	0.106218	0.028134	0.0602777	0.325433
S17	0.0206769	0.147041	0.00709	0.1154	0.709792
S18	0.732338	0	0.0445307	0.223131	0
S19	0.106852	0.458631	0.0471415	0.291356	0.0960191
S20	0.210903	0.0115725	0.247306	0.0156109	0.514607
S21	0.615894	0.199758	0.0776852	0.0576078	0.0490545
S22	0.782685	0	0.171968	0.021261	0.0240864
S23	0.326586	0.449111	0.0765081	0.0846156	0.0631796
S24	0.222475	0.493429	0.22908	0.0550147	0
S25	0.124129	0.273408	0.125466	0.360158	0.116839
S26	0.260442	0	0.0659665	0.666391	0.00720106
S27	0	0	0.110954	0.191682	0.697364
S28	0.22806	0.133111	0.120997	0.381864	0.135968
S29	0.0866667	0.632735	0.104989	0.102735	0.0728737
S30	0.232285	0.176771	0.277185	0.0474088	0.266351
S31	0.150203	0.670493	0.179304	0	0
S32	0.284875	0.105593	0.174879	0.342653	0.0919999
S33	0	0.158681	0	0	0.841319
S34	0.175462	0.328603	0	0.17529	0.320645
S35	0.0569054	0.723488	0.120239	0.013637	0.0857308
S36	0.1166	0	0.768926	0.114474	0
S37	0.184509	0.0036674	0.159934	0.637478	0.0144117
S38	0.123599	0.0122257	0.850334	0.0138413	0
S39	0.230626	0.420498	0	0.190498	0.158378
S40	0	0.00641499	0.037889	0.815493	0.140203

## Sheet: output4
	Weights Source 3	Weights Source 2	Weights Source 4	Weights Source 1
S1	0.3679	0.248797	0.110489	0.272814
S2	0.251067	0.454903	0.171006	0.123024
S3	0.280255	0.111739	0.119658	0.488348
S4	0.311862	0.398894	0.194096	0.0951487
S5	0.386829	0.0830206	0.166711	0.36344
S6	0.490183	0.0359803	0.304746	0.16909
S7	0.80326	0.0229226	0.159691	0.0141263
S8	0.116881	0.156784	0.00694307	0.719392
S9	0.0331882	0.0374418	0.885021	0.0443488
S10	0.704103	0.226815	0.069082	0
S11	0.215614	0.231414	0.0625032	0.490469
S12	0	0.490679	0.0277448	0.481576
S13	0.38654	0.0798694	0.522019	0.0115715
S14	0.0117924	0.148838	0.0145467	0.824823
S15	0.308977	0.0543879	0.562935	0.0736996
S16	0.543331	0.0379916	0.0771794	0.341498
S17	0.0177344	0.113659	0.120304	0.748303
S18	0.763099	0	0.236901	0
S19	0.110448	0.483483	0.302686	0.103383
S20	0.336781	0.105061	0.0100999	0.548058
S21	0.708902	0.161277	0.0773072	0.0525147
S22	0.938409	0	0.0370061	0.024585
S23	0.376081	0.454186	0.0996796	0.0700534
S24	0.309325	0.630044	0.0606315	0
S25	0.165645	0.343235	0.367428	0.123692
S26	0.306125	0.0136982	0.676162	0.00401404
S27	0.0358729	0.0218669	0.193428	0.748832
S28	0.291893	0.175607	0.389528	0.142972
S29	0.101229	0.704533	0.112696	0.081542
S30	0.361645	0.308094	0.0447143	0.285547
S31	0.206095	0.787814	0.00468998	0.00140173
S32	0.380914	0.173883	0.348753	0.0964505
S33	0	0.112184	0	0.887816
S34	0.173635	0.293903	0.191166	0.341296
S35	0.0687982	0.812177	0.0227761	0.0962489
S36	0.468669	0.452931	0.0784001	0
S37	0.260011	0.0844718	0.643795	0.0117214
S38	0.455445	0.544555	0	0
S39	0.234096	0.385173	0.209851	0.170879
S40	0	0.0340665	0.821886	0.144048

## Sheet: plot
Input Weightings 5 sources	Factorized to 5 sources									Input Weightings 4 sources	Factorized to 4 sources
0.32967	0.343877									0.32967	0.3679
0.186813	0.227222									0.186813	0.251067
0.153846	0.17598									0.153846	0.280255
0.186813	0.158707									0.186813	0.311862
0.296703	0.293638									0.296703	0.386829
0.428571	0.401219									0.428571	0.490183
0.703297	0.674282									0.703297	0.80326
0.010989	0									0.010989	0.116881
0.043956	0.0416263									0.043956	0.0331882
0.56044	0.6066									0.56044	0.704103
0.197802	0.155312									0.197802	0.215614
0.021978	0.00635924									0.021978	0
0.373626	0.307262									0.373626	0.38654
0	0.0221518									0	0.0117924
0.230769	0.241293									0.230769	0.308977
0.494505	0.479937									0.494505	0.543331
0.032967	0.0206769									0.032967	0.0177344
0.769231	0.732338									0.769231	0.763099
0.0879121	0.106852									0.0879121	0.110448
0.21978	0.210903									0.21978	0.336781
0.593407	0.615894									0.593407	0.708902
0.901099	0.782685									0.901099	0.938409
0.318681	0.326586									0.318681	0.376081
0.241758	0.222475									0.241758	0.309325
0.186813	0.124129									0.186813	0.165645
0.21978	0.260442									0.21978	0.306125
0.0769231	0									0.0769231	0.0358729
0.263736	0.22806									0.263736	0.291893
0.032967	0.0866667									0.032967	0.101229
0.241758	0.232285									0.241758	0.361645
0.10989	0.150203									0.10989	0.206095
0.362637	0.284875									0.362637	0.380914
0	0									0	0
0.285714	0.175462									0.285714	0.173635
0.10989	0.0569054									0.10989	0.0687982
0.120879	0.1166									0.120879	0.468669
0.230769	0.184509									0.230769	0.260011
0.021978	0.123599									0.021978	0.455445
0.175824	0.230626									0.175824	0.234096
0.043956	0									0.043956	0
0.406593	0.305178									0.406593	0.248797
0.538462	0.438634									0.538462	0.454903
0.142857	0.0322256									0.142857	0.111739
0.241758	0.188219									0.241758	0.398894
0.0989011	0.0462939									0.0989011	0.0830206
0.120879	0.0412662									0.120879	0.0359803
0.021978	0.0294589									0.021978	0.0229226
0.0659341	0									0.0659341	0.156784
0.0659341	0.0368798									0.0659341	0.0374418
0.230769	0.249416									0.230769	0.226815
0.230769	0.192937									0.230769	0.231414
0.549451	0.499542									0.549451	0.490679
0.142857	0.0583228									0.142857	0.0798694
0.307692	0.19513									0.307692	0.148838
0.043956	0.0195291									0.043956	0.0543879
0.142857	0.106218									0.142857	0.0379916
0.164835	0.147041									0.164835	0.113659
0.021978	0									0.021978	0
0.494505	0.458631									0.494505	0.483483
0.0769231	0.0115725									0.0769231	0.105061
0.252747	0.199758									0.252747	0.161277
0.032967	0									0.032967	0
0.56044	0.449111									0.56044	0.454186
0.56044	0.493429									0.56044	0.630044
0.351648	0.273408									0.351648	0.343235
0.010989	0									0.010989	0.0136982
0.0769231	0									0.0769231	0.0218669
0.21978	0.133111									0.21978	0.175607
0.637363	0.632735									0.637363	0.704533
0.285714	0.176771									0.285714	0.308094
0.659341	0.670493									0.659341	0.787814
0.230769	0.105593									0.230769	0.173883
0.197802	0.158681									0.197802	0.112184
0.318681	0.328603									0.318681	0.293903
0.791209	0.723488									0.791209	0.812177
0.0549451	0									0.0549451	0.452931
0.0989011	0.0036674									0.0989011	0.0844718
0.010989	0.0122256									0.010989	0.544555
0.505495	0.420498									0.505495	0.385173
0.032967	0.00641499									0.032967	0.0340665
0.021978	0									0.032967	0.110489
0.0769231	0.0627953									0.10989	0.171006
0.208791	0.210696									0.0769231	0.119658
0.307692	0.364226									0.164835	0.194096
0.197802	0.153135									0.120879	0.166711
0.0549451	0.101212									0.208791	0.304746
0.21978	0.138889									0.021978	0.159691
0.263736	0.309739									0.010989	0.00694307
0.0549451	0									0.78022	0.885021
0.175824	0.0942521									0.032967	0.069082
0.0879121	0.129472									0.043956	0.0625032
0.021978	0.014832									0	0.0277448
0.043956	0.108545									0.406593	0.522019
0.010989	0									0.021978	0.0145467
0.10989	0.111346									0.505495	0.562935
0.032967	0.028134									0.032967	0.0771794
0.0769231	0.00709									0.0769231	0.120304
0.0659341	0.0445307									0.131868	0.236901
0.0879121	0.0471415									0.252747	0.302686
0.197802	0.247306									0.021978	0.0100999
0.0659341	0.0776852									0.0659341	0.0773072
0.032967	0.171968									0	0.0370061
0.043956	0.0765081									0.021978	0.0996796
0.186813	0.22908									0.010989	0.0606315
0.0549451	0.125466									0.274725	0.367428
0.153846	0.0659665									0.582418	0.676162
0.0879121	0.110954									0.10989	0.193428
0.021978	0.120997									0.362637	0.389528
0.164835	0.104989									0.0989011	0.112696
0.142857	0.277185									0.0549451	0.0447143
0.230769	0.179304									0	0.00468998
0.0549451	0.174879									0.285714	0.348753
0	0									0	0
0.010989	0									0.120879	0.191166
0	0.120239									0	0.0227761
0.725275	0.768926									0.0659341	0.0784001
0.197802	0.159934									0.450549	0.643795
0.923077	0.850334									0.032967	0
0.010989	0									0.153846	0.209851
0.0769231	0.037889									0.703297	0.821886
0.032967	0.0927092									0.208791	0.272814
0.10989	0.15707									0.0879121	0.123024
0.0769231	0.122151									0.417582	0.488348
0.164835	0.200732									0.0989011	0.0951487
0.120879	0.162364									0.285714	0.36344
0.208791	0.295137									0.186813	0.16909
0.021978	0.143002									0.032967	0.0141263
0.010989	0.0216632									0.648352	0.719392
0.78022	0.875563									0.0549451	0.0443488
0.032967	0.0497315									0	0
0.043956	0.0597383									0.43956	0.490469
0	0.0220112									0.406593	0.481576
0.406593	0.513264									0.032967	0.0115715
0.021978	0.00767684									0.659341	0.824823
0.505495	0.55574									0.10989	0.0736996
0.032967	0.0602777									0.296703	0.341498
0.0769231	0.1154									0.648352	0.748303
0.131868	0.223131									0.010989	0
0.252747	0.291356									0.0769231	0.103383
0.021978	0.0156109									0.483516	0.548058
0.0659341	0.0576078									0.021978	0.0525147
0	0.021261									0.032967	0.024585
0.021978	0.0846156									0.0549451	0.0700534
0.010989	0.0550147									0	0
0.274725	0.360158									0.131868	0.123692
0.582418	0.666391									0.032967	0.00401404
0.10989	0.191682									0.648352	0.748832
0.362637	0.381864									0.131868	0.142972
0.0989011	0.102735									0.0659341	0.081542
0.0549451	0.0474088									0.274725	0.285547
0	0									0	0.00140173
0.285714	0.342653									0.0659341	0.0964505
0	0									0.802198	0.887816
0.120879	0.17529									0.263736	0.341296
0	0.013637									0.0989011	0.0962489
0.0659341	0.114474									0.032967	0
0.450549	0.637478									0.021978	0.0117214
0.032967	0.0138413									0.010989	0
0.153846	0.190498									0.153846	0.170879
0.703297	0.815493									0.142857	0.144048
0.208791	0.258236
0.0879121	0.114278
0.417582	0.458947
0.0989011	0.0881166
0.285714	0.344569
0.186813	0.161166
0.032967	0.0143676
0.648352	0.668598
0.0549451	0.0459304
0	0
0.43956	0.462541
0.406593	0.457256
0.032967	0.0126066
0.659341	0.775042
0.10989	0.0720914
0.296703	0.325433
0.648352	0.709792
0.010989	0
0.0769231	0.0960191
0.483516	0.514607
0.021978	0.0490545
0.032967	0.0240864
0.0549451	0.0631796
0	0
0.131868	0.116839
0.032967	0.00720106
0.648352	0.697364
0.131868	0.135968
0.0659341	0.0728737
0.274725	0.266351
0	0
0.0659341	0.0919999
0.802198	0.841319
0.263736	0.320645
0.0989011	0.0857308
0.032967	0
0.021978	0.0144117
0.010989	0
0.153846	0.158378
0.142857	0.140203

## Sheet: Final residual
Optimum Rank 6	Final Residuals	Linear Fit to Final residuals	Sum of Squared Residuals of linear fit to final residual					Residual A	Residual B	Residual C	Residual D	Residual Total
2	0.0515906	0.0503069	0.000585249					0.0706172	0.0699868	0.0148279	0.0132557	0.168688
3	0.0350885	0.037656	0.000109101					0.0702037	0.0691919	0.014692	0.0130379	0.167126
4	0.0295655	0.0250051	4.52534e-05					0.069899	0.0691232	0.0144109	0.0113455	0.164779
5	0.0257933	0.0243656	5.43507e-05					0.0694473	0.0690351	0.0127652	0.0115134	0.162761
6	0.0244121	0.023726	9.30416e-05					0.0701085	0.0689488	0.0124597	0.0104754	0.161992
7	0.0231866	0.0230865	0.000135482					0.0699787	0.0688019	0.0115481	0.0104515	0.16078
8	0.0222873	0.0224469	0.000176096					0.0702196	0.068854	0.0114415	0.010241	0.160756
9	0.0214594	0.0218074	0.000212777					0.070037	0.0683748	0.0122137	0.0102218	0.160847
10	0.020499	0.0211678	0.000245329					0.0699957	0.0682104	0.0123941	0.0100381	0.160638
11	0.019353	0.0205283	0.000274843					0.0702334	0.0687097	0.0123634	0.010611	0.161918
12	0.0187715	0.0198888	0.000303061					0.0696484	0.0688438	0.0124844	0.0104658	0.161442
13	0.0179422	0.0192492	0.000329501					0.0701644	0.0688402	0.0125205	0.010172	0.161697
14	0.017435	0.0186097	0.000354858					0.0694592	0.0683053	0.0127804	0.0104528	0.160998
15	0.0169163	0.0179701	0.000378881					0.0701438	0.0683404	0.0126369	0.0109861	0.162107
16	0.0165571	0.0173306	0.000401552
17	0.0158231	0.016691	0.000422514
18	0.0153969	0.0160515	0.000442543
19	0.0150033	0.0154119	0.000461581
20	0.0145943	0.0147724	0.00047953
21	0.0141551	0.0141328	0.000496359
22	0.0136603	0.0134933	0.00051212
23	0.0130653	0.0128537	0.000527065
24	0.0128943	0.0122142	0.000542009
25	0.0124349	0.0115746	0.000556291
26	0.0122188	0.0109351	0.000570646
27	0.0114673	0.0102955	0.000585249
				0.000585249	0.000109101	4.52534e-05	5.43507e-05	9.30416e-05	0.000135482	0.000176096	0.000212777	0.000245329	0.000274843	0.000303061	0.000329501	0.000354858	0.000378881	0.000401552	0.000422514	0.000442543	0.000461581	0.00047953	0.000496359	0.00051212	0.000527065	0.000542009	0.000556291	0.000570646	0.000585249
		0.0503069
		0.037656
		0.0250051
		0.0243656
		0.023726
		0.0230865
		0.0224469
		0.0218074
		0.0211678
		0.0205283
		0.0198888
		0.0192492
		0.0186097
		0.0179701
		0.0173306
		0.016691
		0.0160515
		0.0154119
		0.0147724
		0.0141328
		0.0134933
		0.0128537
		0.0122142
		0.0115746
		0.0109351
		0.0102955
